1  
2  
3  
4  
5  
6  
7  
8  
9  
10  
11  
12

# **A system for CBAF reconstitution reveals roles for BAF47 domains and BCL7 in nucleosome ejection**

Timothy S. Mulvihill<sup>1,2</sup>, Mary L. Nelson<sup>1,2,3</sup>, Naveen Verma<sup>1,2,4</sup>,  
Kevin B. Jones<sup>1,2,3</sup>, and Bradley R. Cairns<sup>1,2,4,\*</sup>

<sup>1</sup>Department of Oncological Sciences, <sup>2</sup>Huntsman Cancer Institute, <sup>3</sup>Department of Orthopaedics,  
<sup>4</sup>Howard Hughes Medical Institute, University of Utah School of Medicine, Salt Lake City, Utah

\*Correspondence: [brad.cairns@hci.utah.edu](mailto:brad.cairns@hci.utah.edu)

## 13 **ABSTRACT**

14

15 Canonical BAF (CBAF) is an essential 12-protein chromatin-remodeling complex that slides and/or  
16 ejects nucleosomes using the alternative catalytic ATP-dependent DNA translocases BRG1 or  
17 BRM. Currently, the regulation of BRG1/BRM activity and nucleosome ejection remain incompletely  
18 understood. To address this, we developed a system for full CBAF reconstitution and purification,  
19 and created a novel nucleosome ejection assay. ARID1A and DPF2 were dispensable for assembly  
20 and chromatin remodeling activity, contrasting with prior work. The actin-related protein BAF53A  
21 and  $\beta$ -actin components interacted and enhanced DNA translocation, and were required for BCL7A  
22 incorporation, which potentiated ejection. BAF47 also regulated ejection, utilizing two stimulatory  
23 domains and an autoinhibitory domain. Finally, we provide evidence for ‘direct’ nucleosome ejection  
24 at low nucleosome density on closed circular arrays. Taken together, we provide powerful new tools  
25 for CBAF mechanistic investigation and reveal new roles for several CBAF components.

26

## 27 **INTRODUCTION**

28

29 BAF family chromatin remodelers (also termed human SWI/SNF family) are large, multi-subunit  
30 complexes that modify chromatin structure to provide DNA access to transcription factors<sup>1,2</sup>. BAF  
31 remodels chromatin structure by using the energy of ATP hydrolysis to mobilize nucleosomes—the  
32 fundamental repeating unit of chromatin—through two primary mechanisms: linear mobilization of  
33 nucleosomes along the DNA, termed sliding, and disassembly of nucleosomes, termed ejection<sup>1,3</sup>.  
34 The human BAF family of chromatin remodelers is divided into three subfamilies, Canonical BAF  
35 (CBAF), Polybromo-associated BAF (PBAF), and GLTSCR1-associated BAF (GBAF, also known as  
36 ncBAF), which share a set of core proteins but are defined by the inclusion of subfamily-specific  
37 subunits<sup>4</sup>.

38

39 BAF subunits are mutated in nearly 20% of all cancers as well as a number of neurodevelopmental  
40 disorders<sup>5-7</sup>. While previous work has characterized a small number of these mutations, the effects  
41 of the vast majority of disease-associated BAF mutations on the targeting and/or enzymatic activity  
42 of the complex remain unclear, due to our lack of knowledge regarding the roles of certain specific  
43 subunits in regulating BAF chromatin remodeling<sup>8-11</sup>. The main barriers to the investigation of BAF  
44 regulation are its size and complexity. CBAF, for example, is over 1 MDa in size and comprised of  
45 12 proteins, which (including paralog alternatives) are encoded by a total of 22 genes, with 1,296  
46 possible combinations of subunits<sup>4</sup>.

47

48 Previous investigations into the regulation of BAF enzymatic activity have relied on purification of  
49 endogenous complexes<sup>12-14</sup> or reconstitution of partial complexes<sup>15,16</sup>, and been highly informative.  
50 However, due to heterogeneity, results obtained by these approaches reflect an ensemble  
51 measurement of complexes with a variety of compositions, making it difficult to isolate the effects of  
52 a single alteration. Additionally, reconstitution of partial complexes may result in the inadvertent  
53 exclusion of important regulatory subunits, potentially skewing results.

54

55 Enzymatic activity of CBAF is provided by one of two mutually exclusive ATP-dependent DNA  
56 translocases, BRG1 or BRM. Insight into the mechanism of chromatin remodeling has come from  
57 studies of related remodelers and homologues from different species, including yeast, flies, and  
58 mice<sup>17</sup>. A key unifying feature of remodelers is that ATP hydrolysis is linked to DNA translocation,  
59 which involves the processive inchworming of two RecA-like ATPase lobes along the DNA sugar-  
60 phosphate backbone, at a rate of one nucleotide per ATP<sup>18,19</sup>, in a manner similar to bacterial DNA  
61 translocases for DNA repair<sup>20</sup>. For BAF-related remodelers, DNA translocation from within the  
62 nucleosome—resulting from the RecA-like lobes residing two superhelical turns from the dyad—  
63 while other domains anchor on the histone octamer, enables both nucleosome sliding and

64 ejection<sup>18,21,22</sup>. Sensitive and scalable assays to assess each of these activities are essential for  
65 understanding how different subunits regulate CBAF activity on a mechanistic level.

66

67 Here, advancing on prior work with partial BAF sub-complexes<sup>15,16,23</sup>, we develop a system for the  
68 production and purification of recombinant full CBAF complex from human cells. We use the system  
69 to investigate assembly dependencies of specific subunits, the roles of particular subunits in  
70 regulating enzymatic activity, and the fundamental mechanism of nucleosome ejection—through the  
71 additional development of a new assay for assessing ejection.

72

## 73 **RESULTS**

74

### 75 **Expression and purification of recombinant CBAF from human cells**

76

77 Our goal was a versatile and efficient system to produce and isolate full 12-protein CBAF, or any  
78 CBAF mutant derivative, for biochemical or structural studies. We advanced on prior work on partial  
79 BAF complexes<sup>15,16,23</sup> by adapting an existing cloning system, biGBac, for use in mammalian cells  
80 by replacing the entry vector, pLib, with pLibMam, a pFastBac1 derivative with a strong constitutive  
81 CMV promoter replacing the polh promoter (Fig. 1a)<sup>24</sup>. The predefined oligonucleotides used in the  
82 biGBac system were redesigned to make the pLibMam vector compatible with the biGBac shuttle  
83 vectors by changing the priming portion of each oligonucleotide to match the pLibMam vector, while  
84 retaining the Gibson homology sequences that match the biGBac pBig1 vectors. This same logic  
85 could in principle be used to make any expression vector compatible with the biGBac system.

86

87 We then assembled a wild type (WT) CBAF expression vector containing the genes encoding  
88 BRG1, BAF170, BAF155, BAF57, BAF60A, SS18, BAF53A, BCL7A, BAF47, and DPF2 (Fig. 1b).  
89 Due to our interest in examining roles for ARID1A, ARID1A was expressed from a separate vector

90 (pLibMam-ARID1A). Finally,  $\beta$ -actin was not overexpressed, as endogenous sources sufficed. Here,  
91 the most widely expressed paralog of each subunit was selected for inclusion in the system (see  
92 Methods). To aid in purification of recombinant CBAF, a 3xFLAG tag was added at the N-terminus  
93 of BAF60A. A single-chain version of the DNA binding domain of the tetracycline repressor (scTetR)  
94 was added at the N-terminus of BAF57 to allow tethering of complexes to the TetO DNA sequence  
95 to enable a Tet-tethered DNA translocation assay, and to eliminate the need for a double affinity  
96 purification to select for TetR heterodimers<sup>25</sup>. The expression vectors were transiently transfected  
97 into human Expi293F cells, and recombinant CBAF was purified from nuclear extracts via 3xFLAG  
98 immunoaffinity purification, competitively eluted with 3xFLAG peptide, concentrated, aliquoted, and  
99 frozen (Fig. 1c).

100

101 We first investigated the roles of the Actin-Related Protein (ARP) module in regulating CBAF  
102 enzymatic activity. Previous studies identified the ARP module of RSC, a yeast homolog of BAF, as  
103 a key regulatory module<sup>26</sup> that enhances the efficiency with which ATP hydrolysis is ‘coupled’ to  
104 DNA translocation, increasing sliding efficiency and potentiating nucleosome ejection<sup>27</sup>. However,  
105 whether this regulatory function is evolutionarily conserved in CBAF is not known, as CBAF contains  
106 the actin-related protein BAF53 and  $\beta$ -actin itself, rather than two ARPs as in RSC<sup>28,29</sup>. As expected,  
107 given that  $\beta$ -actin and BAF53 form an obligate heterodimer within CBAF, exclusion of BAF53A from  
108 the expression vector led to a substantial reduction in both subunits in the resulting purified  
109 complex. Unexpectedly, exclusion of BAF53A also greatly reduced BCL7A incorporation, indicating  
110 that BCL7A is a member of the CBAF ARP module, in keeping with its physical location within CBAF  
111 (Fig. 1d)<sup>30</sup>. Therefore, to thoroughly test the role of the ARP module in regulating CBAF enzymatic  
112 activity (below) we purified both a complex lacking only BCL7A ( $\Delta$ BCL7A) and a complex lacking  
113 BCL7A, BAF53A, and  $\beta$ -actin ( $\Delta$ ARP) (Fig. 1e, f). Purified complexes were assessed with analytical

114 size exclusion chromatography and found to be 85-89% homogenous and monodisperse  
115 (Supplementary Fig. 1).

116 As a second test of the system, we investigated the role of ARID1A in CBAF assembly. Currently,  
117 there are conflicting reports regarding the requirement of an ARID1A paralog for CBAF stability and  
118 activity. Multiple reports indicate its requirement for stability<sup>4,31</sup> while others claim dispensability<sup>15,32</sup>.  
119 Similarly, ARID1A loss has been reported to cause a significant decline in nucleosome remodeling  
120 activity<sup>15</sup>, yet reconstituted partial BAF complexes lacking ARID1A are active<sup>16</sup>. Notably, we found  
121 that CBAF readily assembled in the absence of ARID1A (Fig. 1e, f). To confirm that ARID1A is  
122 present in stoichiometric levels in our WT CBAF complex, we purified a version of the complex with  
123 a His-tag on ARID1A, allowing us to perform a second pulldown of ARID1A-containing complexes  
124 after the 3xFLAG peptide elution step. The relative abundance of each subunit in this complex  
125 closely matched the WT purification, confirming that ARID1A is present at stoichiometric levels in  
126 the WT complex, but simply stains poorly with Coomassie Blue (Fig. 1e).

127

128 As a third test of the system, we examined the role of BAF47 (and domains within) along with DPF2  
129 in regulating CBAF enzymatic activity. BAF47 is frequently mutated in cancer, most notably  
130 malignant rhabdoid tumors, which are characterized by biallelic inactivation of *SMARCB1*, the gene  
131 encoding BAF47<sup>33,34</sup>. The C-terminal tail (CTT) of Sfh1, the yeast homolog of BAF47, has been  
132 identified as a key domain that contacts the nucleosome acidic patch and potentiates nucleosome  
133 ejection<sup>35</sup>. Mutations in the BAF47 CTT are associated with various developmental disorders and  
134 have been shown to compromise CBAF chromatin remodeling activity<sup>13</sup>. Mutations in the N-terminal  
135 winged helix (WH) domain of BAF47 are associated with Schwannomatosis<sup>36</sup>, but there are  
136 conflicting reports regarding its location within the complex<sup>15,30</sup>. BAF47 also contains two centrally  
137 located RPT domains that are required for its association with the complex as well as for  
138 incorporation of DPF2<sup>30</sup>. To investigate the roles of each of these domains we produced a set of

139 nine complexes to test the effects of loss of the BAF47 WH, BAF47 CTT, and DPF2 alone and in  
140 combination, as well as deletion of both subunits entirely (Fig. 1g, h).

141

## 142 **A quantifiable assay for nucleosome ejection using closed circular arrays**

143

144 As nucleosome ejection is linked to ARP and BAF47 function, we next developed a new, scalable,  
145 and quantifiable method of assessing nucleosome ejection activity on defined DNA templates based  
146 on existing assays<sup>12,27,37</sup>. The assay is predicated on three key principles: 1) plasmid DNA purified  
147 from bacteria is inherently negatively supercoiled, 2) nucleosomes store negative supercoils (1 per  
148 nucleosome) and protect them from relaxation by *E. coli* topoisomerase I (Topo I), and 3) plasmid  
149 topoisomers can be readily distinguished on an agarose gel. With these principles in mind, we  
150 assembled poly-nucleosome arrays on a plasmid containing 12 repeats of a 200bp Widom 601  
151 nucleosome positioning sequence, and then incubated the assembled arrays with CBAF and Topo I.  
152 As CBAF ejects nucleosomes, negative supercoils are released into the plasmid and relaxed by  
153 Topo I, leading to a reduction in linking number and decreased electrophoretic mobility on an  
154 agarose gel (Fig 2a, b). We note that this assay lacks histone chaperones or free DNA acceptors of  
155 histones, which can assist the ejection process, but were omitted to focus on the mechanics of  
156 CBAF ejection in isolation.

157

## 158 **ARPs and BCL7A, but not ARID1A, enhance chromatin remodeling**

159

160 We used this nucleosome ejection assay, along with ATPase, DNA translocation, and nucleosome  
161 sliding assays to investigate the roles of ARID1A and the ARP module in regulating CBAF  
162 enzymatic activity. DNA-dependent ATPase activity is assayed using a colorimetric assay that  
163 measures the inorganic phosphate released by ATP hydrolysis by complexation with molybdate-  
164 malachite green. DNA translocation is assessed with a topology assay that measures supercoiling

165 induced by translocation along the DNA sugar-phosphate backbone while tethered to a fixed  
166 location on the plasmid via the TetR-TetO interaction. Nucleosome sliding is assayed by the  
167 repositioning of a centrally located nucleosome to the end of a 200bp Widom 601 nucleosome  
168 positioning sequence. Each assay was performed four or more times—at least twice with each of  
169 two different purified complexes for each variant—with at least three timepoints or replicate samples  
170 in each experiment used for statistical analysis. A summary of the data, normalized to WT activity  
171 levels, is shown (Fig. 2c).

172

173 First, DNA-dependent ATPase activity (at  $V_{max}$ ) was not decreased by loss of ARID1A, BCL7A, or  
174 the ARP module. This demonstrates that the core ATPase activity of BRG1 remains intact in each of  
175 these complexes and that reductions in activity observed in the other assays are due to defects in  
176 linking ATPase activity to particular remodeling outcomes, rather than a defect in the motor itself.  
177 While the  $\Delta$ BCL7A complex had WT levels of DNA translocation, the  $\Delta$ ARPs complex displayed  
178 significantly reduced activity (Fig. 2d, e, and Supplementary Fig. 2), consistent with previous work  
179 on RSC and supporting an evolutionarily conserved role for ARPs in improving the efficiency with  
180 which ATP hydrolysis is coupled to DNA translocation<sup>27</sup>. As expected, given their relative DNA  
181 translocation capacities, the  $\Delta$ BCL7A complex had WT levels of nucleosome sliding while the  
182  $\Delta$ ARPs complex had reduced nucleosome sliding activity (Fig. 2f, g, and Supplementary Fig. 3).  
183 Intriguingly, the defect in nucleosome sliding observed with loss of the ARP module was smaller in  
184 magnitude than the defect in DNA translocation. This may reflect differences in the biophysical  
185 parameters of the two assays. The tethered DNA translocation assay requires high processivity  
186 (10bp per supercoil) and considerable force resistance in its ATPase-DNA ‘grip’ to produce  
187 highly supercoiled topoisomers. In contrast, nucleosome sliding is achievable with low processivity  
188 and low force resistance due to the requirement of breaking only 1-2 histone-DNA contacts at a  
189 time<sup>1</sup>.



190

191 Interestingly, despite approximately WT levels of ATPase, translocation, and sliding activity, the  
192  $\Delta$ BCL7A complex had a significant reduction in nucleosome ejection (Fig. 2h, i, and Supplementary  
193 Fig. 4). Nucleosome ejection is a high-force, high-processivity action, as it requires simultaneous  
194 rupture of multiple histone-DNA contacts. Because the robust translocation activity of this remodeler  
195 indicates that processivity and DNA grip is intact, we speculate that loss of BCL7A causes a  
196 reduction in force resistance due to a defect in anchoring on the histone octamer and/or reduced  
197 DNA translocation processivity on the octamer. As expected, given its reduced DNA translocation  
198 and nucleosome sliding activities, the  $\Delta$ ARPs complex also had significantly decreased nucleosome  
199 ejection activity. While a portion of the loss of ejection activity can be attributed to loss of BCL7A,  
200 the  $\Delta$ ARPs complex trended towards lower levels of nucleosome ejection than the  $\Delta$ BCL7A  
201 complex. Here, the trend towards decreased activity relative to the  $\Delta$ BCL7A complex suggested that  
202 both the presumed histone anchoring provided by BCL7A and the enhanced coupling provided by  
203 BAF53A and  $\beta$ -actin may be required for full WT levels of nucleosome ejection.

204

205 Surprisingly, the  $\Delta$ ARID1A complex was found to have WT or increased levels of ATPase, DNA  
206 translocation, nucleosome sliding, and nucleosome ejection (Fig. 2c-i). This result contrasts with a  
207 previous report that showed a major decrease in nucleosome sliding activity with loss of ARID1A<sup>15</sup>.  
208 While both this study and the previous report used the Widom 601 nucleosome positioning  
209 sequence as a template for sliding assays, the previous result was obtained using partial CBAF  
210 complexes lacking both SS18 and BCL7A—a subunit shown above to play a key role in regulating  
211 nucleosome remodeling. The prior study also used *Xenopus* histone octamers, rather than the  
212 *Drosophila* octamers used in this study. Histone octamer identity has been shown to influence  
213 chromatin remodeling by RSC, raising the possibility that ARID1A loss reduces remodeling activity  
214 only in particular nucleosome contexts<sup>38</sup>.

215

216 **BAF47 regulates ejection through inhibitory and stimulatory domains**

217

218 We next investigated the roles of BAF47 and DPF2. Here, each assay was performed four times,  
219 generally twice with each of two different purified complexes for each variant, with multiple  
220 timepoints or replicates from each experiment used for statistical analysis, as summarized (Fig. 3a).  
221 The nine complexes fall into two series (+DPF2 and  $\Delta$ DPF2), with four different BAF47 variants  
222 (WT,  $\Delta$ WH,  $\Delta$ CTT, and  $\Delta$ WH  $\Delta$ CTT) in each, along with a ninth complex ( $\Delta$ BAF47  $\Delta$ DPF2). All  
223 variant complexes trended toward decreased ATPase activity, with four (BAF47  $\Delta$ CTT +DPF2,  
224 BAF47 WT  $\Delta$ DPF2, BAF47  $\Delta$ WH  $\Delta$ CTT  $\Delta$ DPF2, and  $\Delta$ BAF47  $\Delta$ DPF2) reaching statistical  
225 significance. However, all had at least 75% of WT activity, indicating that the core ATPase activity of  
226 BRG1 is only modestly affected by each of these alterations.

227

228 All variant complexes in the +DPF2 series had significantly reduced DNA translocation activity (Fig.  
229 3b-c, and Supplementary Fig. 5). However, the observed decreases closely matched the respective  
230 reductions in ATPase activity, indicating that the translocation deficits can likely be attributed to  
231 reduced ATPase activity rather than a reduction in coupling efficiency. The variant complexes in the  
232  $\Delta$ DPF2 series all had DNA translocation capacities that exceeded their relative ATPase activities,  
233 indicating that coupling efficiency is intact or slightly elevated in each of the variant complexes. In  
234 addition, the  $\Delta$ BAF47  $\Delta$ DPF2 complex had WT levels of DNA translocation. Collectively, these  
235 results indicate that neither DPF2 nor BAF47 loss confers a deficit in processivity or force  
236 resistance.

237

238 Nucleosome sliding activity was highly correlated with DNA translocation activity for all variant  
239 complexes in the +DPF2 and  $\Delta$ DPF2 series (Fig. 3d, e, and Supplementary Fig. 6). Two complexes

240 (BAF47  $\Delta$ CTT +DPF2 and BAF47  $\Delta$ WH  $\Delta$ CTT +DPF2) had statistically significantly reduced  
241 nucleosome sliding activity, although as with the DNA translocation assay, the observed reduction  
242 can be attributed to decreased ATPase activity rather than a specific defect in nucleosome sliding.  
243 Intriguingly, the  $\Delta$ BAF47  $\Delta$ DPF2 complex displayed significantly increased nucleosome sliding  
244 activity. Taken together, these results indicate that neither DPF2 nor BAF47 loss confers a deficit in  
245 nucleosome engagement.

246  
247 Notably, all variant complexes had a statistically significant decrease in ejection activity, with the  
248 magnitude of the decrease being attributable to the specific BAF47 truncation, which was consistent  
249 across both the +DPF2 and  $\Delta$ DPF2 series (Fig. 3f-h, and Supplementary Fig. 7). Specifically,  
250 deletion of the BAF47 WH caused a ~15-20% reduction in activity, deletion of the CTT caused a  
251 ~30% reduction in activity, and deletion of both the WH and the CTT had an additive effect, causing  
252 a ~40-45% reduction in activity. Importantly, for all BAF47 truncations, the measured decrease in  
253 ejection activity exceeded the decrease in activity in each of the other assays, indicating a specific  
254 role for BAF47 in regulating nucleosome ejection, rather than remodeling in general. The ejection  
255 activity of each BAF47 variant was unaffected by deletion of DPF2, indicating that DPF2 does not  
256 regulate nucleosome ejection. Surprisingly, deletion of both BAF47 and DPF2 conferred a ~15-20%  
257 reduction, less severe than the combined WH and CTT truncations, implying the presence of a  
258 previously unknown autoinhibitory domain in the central portion of BAF47.

259  
260 **CBAF is capable of direct ejection of nucleosome**

261  
262 Finally, we adapted our new nucleosome ejection assay to garner insight into the mechanism of  
263 nucleosome ejection by CBAF. Two possible mechanisms have been proposed—direct ejection of  
264 nucleosomes<sup>39</sup> and unspooling of DNA from an adjacent nucleosome<sup>40–42</sup>. Direct nucleosome

265 ejection involves ejection of the nucleosome that is directly engaged/bound by the remodeler,  
266 whereas the spooling mechanism involves first sliding a nucleosome into an adjacent nucleosome,  
267 followed by additional DNA translocation/sliding, resulting in unspooling of DNA from the  
268 neighboring octamer—causing ejection. Importantly, the direct ejection method would allow for  
269 ejection of all nucleosomes from a circular array, whereas the spooling mechanism would result in  
270 retention of a single nucleosome on the array. We note that these mechanisms are not mutually  
271 exclusive, and may instead be regulated and/or occur at very different rates.

272  
273 Our assessment recognized that the two terminal products of direct ejection or spooling would result  
274 in different plasmid topoisomers (with linking numbers of 0 and -1, respectively) suggesting that they  
275 might be distinguishable on an agarose gel. However, the presence of nicked DNA in our samples,  
276 which migrates at a very similar rate to the fully relaxed plasmid, prevented visualization of the  
277 relaxed plasmid and made it challenging to observe whether the final end product of the ejection  
278 assay was a fully relaxed plasmid or a topoisomer with a linking number equal to -1. To overcome  
279 this limitation, we utilized T5 exonuclease, which degrades nicked—but not covalently closed—  
280 plasmids to remove nicked DNA from the assay, allowing for visualization of changes in the relative  
281 abundance of the fully relaxed and -1 topoisomers during a timecourse ejection assay (Fig. 4a, b).  
282 With this modified ejection assay we observed a clear increase in fully-relaxed plasmid abundance  
283 over time, with no observable buildup of a -1 intermediate—thus providing evidence for direct  
284 ejection of nucleosomes by CBAF. This result strongly supports a direct ejection mechanism at low  
285 nucleosome densities, while leaving open the possibility of a spooling mechanism at high  
286 nucleosome densities.

## 288 **DISCUSSION**

290 Here, we have created a flexible system for the production, purification, and assessment of full  
291 recombinant CBAF to facilitate investigation of CBAF assembly, activity, and regulation (Fig. 1a, b).  
292 The system allows for the rapid production of WT and variant complexes with defined composition  
293 from human cells, to promote physiologically-relevant folding and post-translational modification of  
294 subunits. Notably, incorporation of endogenous subunits was minimal ( $\beta$ -actin excepted), owing to  
295 the high level of overexpression achieved with the system. This makes the system suitable for  
296 production and isolation of variant complexes with different paralogs or mutant subunits without the  
297 need to suppress production of endogenous proteins (Fig. 1g, h).

298

299 We have also developed a nucleosome ejection assay to aid in assessment of CBAF activity and  
300 regulation (Fig. 2a, Fig. 4a). The assay is adaptable, easily quantifiable, and requires no specialized  
301 equipment. As the force/physics parameters are different, nucleosome sliding activity is not always  
302 predictive of ejection activity. Therefore, this assay enables insight into the enzymatic activity of  
303 variant complexes that is unattainable with conventional sliding assays (Fig. 2c). In addition, the  
304 identity of the nucleosome positioning sequence may be altered to enable investigation of the  
305 effects of DNA sequence on nucleosome ejection activity, as has been performed for nucleosome  
306 sliding<sup>43</sup>.

307

308 This assay provided insight into whether direct ejection or spooling is the predominant mechanism  
309 of nucleosome ejection, and if ejection can occur efficiently without histone chaperones. SWI/SNF-  
310 family remodelers can transfer histone octamers<sup>44</sup>, exchange H2A/H2B dimers<sup>45</sup>, and disassemble  
311 nucleosomes<sup>39</sup>, and were initially thought to require acceptor DNA or chaperones. Disassembly of  
312 mononucleosomes has recently been observed in the absence of chaperones or acceptor DNA<sup>27</sup>.  
313 Likewise, nucleosome ejection via the spooling mechanism can occur with nucleosome dimer  
314 templates in the absence of chaperones<sup>42</sup>. However, the efficiency of direct ejection compared to

315 spooling has not been determined previously in a closed polynucleosome array format, which better  
316 resembles *in vivo* chromatin. Ejection from circular polynucleosome arrays without chaperones has  
317 also been reported, but the assay cannot distinguish between the two proposed mechanisms<sup>12,27,37</sup>.  
318 Here, the ejection assay with T5 exonuclease treatment revealed the clear loss of the final  
319 nucleosome from a closed circular array (Fig. 4a). Notably, the assay was performed in the absence  
320 of histone chaperones or receptor DNA. Importantly, there is no evidence in the data for a buildup or  
321 delay in removal of the final octamer, indicating that direct ejection of the last octamer occurs with  
322 similar efficiency as removal of all other octamers on the array. Therefore, while we cannot exclude  
323 the possibility that ejection can occur by both direct and spooling mechanisms, the high rate of  
324 removal of the final nucleosome indicates that direct ejection is an efficient mode of nucleosome  
325 ejection by BAF. Here, interesting future work may be directed at understanding nucleosome  
326 modifications or variants that might stimulate or prevent ejection by either of these modes.

327

328 Our data confirm that  $\beta$ -actin and BAF53A form an obligate heterodimer within BAF and identify  
329 BCL7A as a functional member of the ARP module (Fig. 2c). BCL7A frequently undergoes biallelic  
330 inactivation in diffuse large B-Cell lymphoma, and our data identify a mechanistic consequence of its  
331 loss in this disease<sup>46</sup>. The results of our investigation into ARPs function align with previous work on  
332 a yeast remodeler showing that the ARP module enhances the efficiency with which ATP hydrolysis  
333 is coupled to DNA translocation<sup>27</sup>, highlighting the evolutionary conservation of regulatory logic  
334 within SWI/SNF family remodelers. This provides additional support for the ability of results obtained  
335 using remodelers from different species to predict the roles of homologous subunits and domains in  
336 their human counterparts.

337

338 The role of ARID1A in CBAF stability and enzymatic activity has been unclear, due to conflicting  
339 reports in the literature<sup>4,15,16,31,32</sup>. Here, we show that CBAF complexes readily assemble in the

340 absence of ARID1A and retain WT levels of enzymatic activity, providing compelling evidence for  
341 the dispensability of this subunit under our experimental conditions. However, our data do not  
342 preclude the possibilities that ARID1A may enhance CBAF assembly efficiency under certain  
343 conditions, or that ARID1A may promote chromatin remodeling of variant or modified nucleosomes.

344

345 One result of particular interest is the multifaceted regulation of nucleosome ejection by BAF47  
346 through its two stimulatory domains (WH and CTT) and a central autoinhibitory domain (Fig. 4a).  
347 Previous studies identified the CTT as a stimulatory domain that potentiates nucleosome sliding and  
348 ejection through its interaction with the nucleosome acidic patch<sup>13,35</sup>. In addition, RSC displays  
349 enhanced nucleosome ejection activity on nucleosomes with an extended acidic patch<sup>38</sup>. One  
350 attractive explanation involves the CTT providing an anchoring point for the complex on the histone  
351 octamer (specifically, the ‘dish face’ H2A-H2B dimer) that can assist in chromatin remodeling.  
352 However, CBAF complexes lacking BAF47 have only a modest decrease in nucleosome ejection  
353 activity—and display an increase in sliding. Therefore, we speculate that the CTT may instead (or  
354 additionally) function as a sensor, and stimulate ejection activity when in contact with the  
355 nucleosome acidic patch. Notably, the WH domain interacts with the HSA domain of BRG1<sup>30</sup>, which  
356 provides the assembly platform for the ARPs<sup>47</sup>, suggesting a possible mechanistic link between  
357 BAF47 and the ARP module. Additional studies will be required to determine whether the WH and  
358 CTT are purely stimulatory domains, or whether one or both domains instead function to relieve  
359 autoinhibition imposed by the central portion of BAF47 (Fig. 4c). Intriguingly, the central portion of  
360 BAF47 interacts with BCL7A<sup>30</sup>, which suggests a possible mechanism for BAF47 autoinhibition  
361 through modulation of BCL7A, which interacts with the ARP module (Fig 2C).

362

363 These data underscore the importance of context when assaying mechanistic contributions. For  
364 example, both the  $\Delta$ ARP (Fig. 2h) and the BAF47  $\Delta$ WH  $\Delta$ CTT (Fig. 3f) complexes had decreased



365 ejection activity, but for different reasons. Deletion of the ARP module lowered ejection activity by  
366 reducing DNA translocation efficiency, whereas BAF47 truncations decreased ejection via  
367 autoinhibition without affecting the core enzymatic activity of BRG1. This raises the possibility that  
368 ARP loss may confer an ejection defect on all nucleosomes due to an inherent reduction in motor  
369 activity, whereas BAF47 alterations may cause remodeling deficits only on particular variant or  
370 modified nucleosomes.

371  
372 Taken together, our work establishes a versatile and effective system for producing full recombinant  
373 CBAF, as well as a novel assay for nucleosome ejection, providing a potent combination for the  
374 investigation of CBAF assembly, activity, and regulation. Our results provide insight into subunit  
375 assembly dependencies, the regulatory logic governing enzymatic activity, and the fundamental  
376 mechanism of nucleosome ejection. For the field, this system can easily be extended to examine  
377 mutations linked to cancer and developmental disorders, and adapted for the production of other  
378 SWI/SNF(BAF)-family complexes such as GBAF and PBAF—as well as tailored derivatives—for  
379 both biochemical and structural studies.

## 381 **ACKNOWLEDGEMENTS**

382  
383 This work was supported by U54CA231652 (K.B.J. and B.R.C.) and F30CA225163 (T.S.M.). We  
384 thank Tim Formosa, Mahesh Chandrasekharan, Alisha Schlichter, and Margaret Kasten for helpful  
385 comments on the manuscript.

## 387 **AUTHOR CONTRIBUTIONS**

388  
389 T.S.M. and B.R.C. conceived the study. T.S.M., K.B.J., and B.R.C. designed the experiments.  
390 T.S.M., M.L.N., and N.V. performed the experiments. T.S.M. and B.R.C. wrote the manuscript.



392 **METHODS**

393

394 **biGBac cloning**

395

396 The pLibMam vector (pFastBac1-CMV) was a gift from Dr. Erhu Cao. cDNAs encoding each of the  
397 CBAF subunits were PCR-amplified using Phusion DNA polymerase in HiFi Phusion buffer (NEB)  
398 and subcloned into pLibMam vectors using NEBuilder HiFi (NEB) and homemade chemically  
399 competent Top10 *E. coli*. pBig1 and pBig2 expression vectors were assembled using Phusion  
400 polymerase and NEBuilder HiFi according to published protocols<sup>24</sup>. DH10B electrocompetent cells  
401 (Thermo Fisher) were used for pBig2 cloning.

402

403 **Expression vector design**

404

405 CBAF complexes were assembled using the following plasmids for transfection: pBIG2-WT and  
406 pLibMam-ARID1A (WT); pBIG2-WT ( $\Delta$ ARID1A); pBIG2- $\Delta$ BCL7A and pLibMam-ARID1A ( $\Delta$ BCL7A);  
407 pBIG2- $\Delta$ ARP and pLibMam-ARID1A ( $\Delta$ ARP); pBIG2- $\Delta$ TetR, pLibMam-BCL7A, pLibMam-BAF53A,  
408 pLibMam-DPF2, and pcDNA6-ARID1A (ARID1A-Pulldown). For the DPF2 and BAF47 studies, base  
409 expression vectors were pBIG2- $\Delta$ BAF47 and pLibMam-ARID1A. Additional pLibMam plasmids  
410 encoding DPF2, BAF47, BAF47  $\Delta$ WH, BAF47  $\Delta$ CTT, and/or BAF47  $\Delta$ WH  $\Delta$ CTT were co-transfected  
411 as indicated. A 3xFLAG epitope tag is included on the N-terminus of BAF60A to facilitate  
412 purification. A single-chain version of the tetracycline repressor (scTetR) is included on the N-  
413 terminus of BAF57 to enable a tet-tethered DNA translocation assay.

414

415 **Expression and purification of recombinant CBAF**

416

417 Expi293F cells (Thermo Fisher) were grown and transiently transfected according to the  
418 manufacturer's instructions. Cells were harvested 72 hours post-transfection by centrifugation for 5'  
419 at 500 g at 4° C. All subsequent steps were performed at 4° C. Cells were washed in TBS,  
420 resuspended in Buffer A (20 mM HEPES pH 8.0, 1.5 mM MgCl<sub>2</sub>, 10 mM KCl, 0.25% NP-40, 0.5 mM  
421 DTT, protease inhibitors), and incubated on ice 10' prior to homogenizing with a Dounce (Wheaton  
422 or Sigma). Nuclei were pelleted by centrifugation for 5' at 5000 rpm, resuspended in Buffer C (20  
423 mM HEPES pH 8.0, 25% glycerol, 1.5 mM MgCl<sub>2</sub>, 420 mM KCl, 0.25% NP-40, 0.2 mM EDTA, 0.5  
424 mM DTT, protease inhibitors), Dounce homogenized, and extracted for 30' with rotation. Nuclear  
425 extracts were clarified by centrifugation for 30' at 20,000 g and applied to anti-Flag M2 affinity gel  
426 (Sigma) and rotated for 45'. Flag resin was pelleted by centrifugation for 1' at 1500 g, washed 3x  
427 with Buffer C and 3x with Sizing buffer (20 mM HEPES pH 8.0, 200 mM NaCl, 10% glycerol, 0.5 mM  
428 DTT, protease inhibitors). CBAF was eluted 2x30' with 250 ng/μl 3xFlag peptide (Sigma) in Sizing  
429 buffer. Elution fractions were pooled, concentrated to 500-1000 ng/μl using spin concentrators with a  
430 100 kDa cutoff (Amicon), and filtered through a 0.22-micron spin-X column (Corning Costar).  
431 Purified, concentrated, and filtered complexes were aliquoted and flash-frozen in liquid nitrogen and  
432 stored at -80° C.

433

#### 434 **Size exclusion chromatography**

435

436 Purified complexes were analyzed on a Superose 6 Increase 3.2/300 GL (GE) at 0.01 ml/min in  
437 Sizing buffer (20 mM HEPES pH 8.0, 200 mM NaCl, 10% glycerol, 0.5 mM DTT) using an AKTA  
438 Pure (GE). Curves in the range of 0.75 ml to 1.75 ml were fitted using Prism as the sum of 2  
439 gaussians corresponding to the aggregated fraction (Void) and the monodisperse fraction (CBAF).  
440 The area under each gaussian was calculated according to the equation  $Area = (Amplitude * Standard$

441 Deviation)/0.3989 and used to determine the fraction of CBAF that was monodisperse in each  
442 sample.

443

#### 444 **ARID1A double purification**

445

446 CBAF with a 6xHis-tagged ARID1A was purified as described above with the following  
447 modifications. Expi293F cells were transfected with the following plasmids: pBIG2- $\Delta$ TetR, pLibMam-  
448 BCL7A, pLibMam-BAF53A, pLibMam-DPF2, and pcDNA6-ARID1A (ARID1A-Pulldown). After Flag  
449 elution, the purified complex was applied to Ni-NTA agarose (Qiagen) and rotated 60' at 4° C. The  
450 resin was washed 3x with Sizing buffer and eluted with 200 mM imidazole in Sizing buffer. The  
451 purified complex was concentrated, filtered, and frozen as above.

452

#### 453 **Nucleosome assembly**

454

455 Recombinant *Drosophila* octamers were expressed in BL21-CodonPlus (DE3)-RIL *E. coli*, purified,  
456 and assembled into octamers by salt dialysis, as described<sup>27,48</sup>.

457

458 200 bp dsDNA fragments with a central Widom 601<sup>49</sup> nucleosome positioning sequence were  
459 produced by digestion of plasmid pUC12x601 with Aval, purified using a Prep Cell (BioRad) with  
460 4.5% native polyacrylamide gel at 400 V in 0.5x TBE (45 mM Tris-Borate pH 8.0, 1 mM EDTA) and  
461 eluted with TE buffer (10 mM Tris, 1 mM EDTA) as described<sup>27</sup>.

462

463 Mononucleosomes were assembled at 4° C using salt dialysis by mixing *Drosophila* octamers with  
464 DNA at a 1:1 or 1.2:1 molar ratio with 0.1 mg/ml BSA in RB-high (10 mM Tris-HCl pH 7.4, 2 M KCl,  
465 1 mM EDTA, 1 mM DTT) in a Slide-A-Lyzer mini dialysis unit with a 7,000 Da molecular weight

466 cutoff (Thermo Fisher). Assemblies were dialyzed for 1000 minutes against 500 ml of RB-high,  
467 which was replaced at a rate of 2 ml/min with RB-low (10 mM Tris-HCl pH 7.4, 50 mM KCl, 1 mM  
468 EDTA, 1 mM DTT) using an Econo-pump (BioRad), as described<sup>27,48</sup>.  
469  
470 Nucleosome arrays were assembled using *Drosophila* octamers and the 5 kb pUC12x601 plasmid,  
471 which contains 12 repeats of the Widom 601 nucleosome positioning sequence. Arrays were  
472 assembled using the same protocol as the mononucleosome assembly described above, but with  
473 3:1, 6:1, 9:1, or 12:1 molar ratios of octamer to plasmid (1:4, 2:4, 3:4 and 4:4 molar ratios of octamer  
474 to Widom 601 nucleosome positioning sequence) and a 400 ml starting volume of RB-high.

475

#### 476 **ATPase assay**

477

478 ATPase activity was measured using a colorimetric assay that detects inorganic phosphate by  
479 complexation with molybdate-malachite green. Assays were performed under  $V_{\max}$  conditions at 30°  
480 C and 500 RPM in a thermomixer (Eppendorf) by incubation of 200 fmol CBAF with 100 ng of  
481 Bluescript plasmid in 5  $\mu$ l ATPase buffer (10 mM HEPES pH 7.3, 20 mM KOAc, 5 mM MgCl<sub>2</sub>, 5%  
482 glycerol, 0.1 mg/ml BSA, 0.5 mM DTT, 1 mM ATP). After 30', 80  $\mu$ l MGAM (3 volumes MG (.045%  
483 malachite green in 0.1 N HCl) to 1 volume AM (4.3% ammonium molybdate in 4 N HCl)) was added,  
484 followed 1' later with 10  $\mu$ l 34% w/v sodium citrate. After a 10' incubation, OD<sub>650 nm</sub> was recorded,  
485 essentially as described<sup>27</sup>.

486

#### 487 **DNA translocation assay**

488

489 A 3 kb plasmid with a tetracycline operator (TetO) was relaxed with *E. coli* topoisomerase I prior to  
490 incubation with CBAF. CBAF is anchored to the TetO sequence via the DNA-binding domain of the

491 tetracycline repressor (TetR), which is present as an N-terminal fusion on BAF57. Translocation  
492 along the DNA sugar-phosphate backbone produces positive supercoils ahead of the remodeler and  
493 negative supercoils in its wake. Topo I only relaxes negative supercoils, resulting in the  
494 accumulation of positive supercoils as translocation occurs. DNA translocation experiments were  
495 performed as a timecourse using a 50  $\mu$ l starting volume containing 1250 fmol CBAF, 1250 ng  
496 relaxed plasmid, 1 mM ATP, 6.25 U topoisomerase 1 (NEB), and 1 mg/ml BSA in 1xNEB4.  
497 Reactions were incubated at room temperature. 9  $\mu$ l aliquots were removed at each timepoint and  
498 heat-inactivated for 20' at 65° C. Samples were deproteinated with 1  $\mu$ l 10% SDS and 1  $\mu$ l 10 mg/ml  
499 proteinase K at 50° C for 60'. Samples were ethanol-precipitated and run on a 1.3% agarose gel for  
500 3 hr at 130 V. Gels were stained for 20' with 1  $\mu$ l/ml ethidium bromide (EtBr) and scanned on a  
501 Typhoon Trio (GE), essentially as described<sup>27</sup>.

502

### 503 **Nucleosome sliding assay**

504

505 Nucleosome sliding experiments were performed as a timecourse at a 1:8 CBAF to nucleosome  
506 molar ratio using a 51  $\mu$ l starting volume containing 300 fmol CBAF, 2400 fmol nucleosomes, 0.1  
507 mg/ml BSA, and 1 mM ATP in Sliding buffer (10 mM Tris pH 7.5, 50 mM KCl, 3 mM MgCl<sub>2</sub>, 0.5 mM  
508 DTT). Reactions were incubated at room temperature or 30° C. At each timepoint, 8.5  $\mu$ l was  
509 removed and quenched by the addition of 100 ng competitor DNA and EDTA to a concentration of  
510 13 mM. Glycerol was added to a final concentration of 10% and samples were loaded on a 4.5%  
511 native polyacrylamide gel in 0.4x TBE and run for 50' at 110 V. Gels were stained for 10' with 1  $\mu$ l/ml  
512 EtBr and scanned on a Typhoon Trio (GE), essentially as described<sup>27</sup>.

513

### 514 **Nucleosome ejection assay**

515

516 Nucleosome ejection experiments were performed as a timecourse at a 1:2 CBAF to nucleosome  
517 molar ratio (6:1 CBAF:Array molar ratio) in a 120  $\mu$ l starting volume containing 2400 fmol CBAF, 400  
518 fmol arrays, 6 U *E. coli* Topoisomerase 1 (NEB), 0.1 mg/ml BSA, and 1.25 mM ATP in Sliding buffer  
519 (10 mM Tris pH 7.5, 50 mM KCl, 3 mM MgCl<sub>2</sub>, 0.5 mM DTT). Reactions were incubated at 30° C  
520 and 500 RPM in a thermomixer (Eppendorf). 20  $\mu$ l aliquots were removed at each timepoint and  
521 heat-inactivated for 20' at 65° C. Samples were deproteinated with 2.5  $\mu$ l 10% SDS and 2.5  $\mu$ l 10  
522 mg/ml proteinase K at 50° C for 60'. Samples were ethanol-precipitated and run on a 0.9% agarose  
523 gel for 3 hr at 250 V. Gels were stained for 20' with 1  $\mu$ l/ml EtBr and scanned on a Typhoon Trio  
524 (GE).

525

526 For the ejection assay shown in Fig. 4, the experiment was performed as above with the following  
527 modifications: after ethanol precipitation, samples were resuspended in 10  $\mu$ l NEB4, 10 U T5  
528 exonuclease (NEB) were added, and samples were incubated at 37° C for 60'. Samples were  
529 subsequently subjected to gel electrophoresis as above.

530

### 531 **Statistical rigor**

532

533 Each biochemical assay was performed four times: generally, twice with each of two separate  
534 purifications of each variant complex. Within each experiment, 3 replicates (ATPase) or 3-5 linear  
535 range timepoints (Translocation, Sliding, Ejection) were used to compare relative activity. Data are  
536 normalized to mean WT activity within an assay (ATPase) or to WT activity at each timepoint within  
537 an assay (Translocation, Sliding, Ejection). Significance was calculated using a t-test (ATPase) or  
538 paired t-test (Translocation, Sliding, Ejection) of each variant complex relative to WT.

539

540 **REFERENCES**

541

- 542 1. Clapier, C. R., Iwasa, J., Cairns, B. R. & Peterson, C. L. Mechanisms of action and regulation of ATP-  
543 dependent chromatin-remodelling complexes. *Nature Reviews Molecular Cell Biology* **18**, 407–422  
544 (2017).
- 545 2. Lorch, Y. & Kornberg, R. D. Chromatin-remodeling and the initiation of transcription. *Quarterly Reviews*  
546 *of Biophysics* **48**, 465–470 (2015).
- 547 3. Becker, P. B. & Workman, J. L. Nucleosome remodeling and epigenetics. *Cold Spring Harb Perspect Biol*  
548 **5**, (2013).
- 549 4. Mashtalir, N. *et al.* Modular Organization and Assembly of SWI/SNF Family Chromatin Remodeling  
550 Complexes. *Cell* **175**, 1272–1288.e20 (2018).
- 551 5. Kadoch, C. *et al.* Proteomic and bioinformatic analysis of mammalian SWI/SNF complexes identifies  
552 extensive roles in human malignancy. *Nat Genet* **45**, 592–601 (2013).
- 553 6. Shain, A. H. & Pollack, J. R. The spectrum of SWI/SNF mutations, ubiquitous in human cancers. *PLoS*  
554 *One* **8**, e55119 (2013).
- 555 7. Sokpor, G., Xie, Y., Rosenbusch, J. & Tuoc, T. Chromatin Remodeling BAF (SWI/SNF) Complexes in  
556 Neural Development and Disorders. *Front. Mol. Neurosci.* **10**, (2017).
- 557 8. Bultman, S. J., Gebuhr, T. C. & Magnuson, T. A Brg1 mutation that uncouples ATPase activity from  
558 chromatin remodeling reveals an essential role for SWI/SNF-related complexes in  $\beta$ -globin expression and  
559 erythroid development. *Genes Dev.* **19**, 2849–2861 (2005).
- 560 9. Clapier, C. R., Verma, N., Parnell, T. J. & Cairns, B. R. Cancer-Associated Gain-of-Function Mutations  
561 Activate a SWI/SNF-Family Regulatory Hub. *Mol Cell* **80**, 712–725.e5 (2020).
- 562 10. Dykhuizen, E. C. *et al.* BAF complexes facilitate decatenation of DNA by topoisomerase II $\alpha$ . *Nature* **497**,  
563 624–627 (2013).

- 564 11. Hodges, H. C. *et al.* Dominant-negative SMARCA4 mutants alter the accessibility landscape of tissue-  
565 unrestricted enhancers. *Nature Structural & Molecular Biology* **25**, 61–72 (2018).
- 566 12. Kwon, H., Imbalzano, A. N., Khavari, P. A., Kingston, R. E. & Green, M. R. Nucleosome disruption and  
567 enhancement of activator binding by a human SWI/SNF complex. *Nature* **370**, 477–481 (1994).
- 568 13. Valencia, A. M. *et al.* Recurrent SMARCB1 Mutations Reveal a Nucleosome Acidic Patch Interaction  
569 Site That Potentiates mSWI/SNF Complex Chromatin Remodeling. *Cell* **179**, 1342–1356.e23 (2019).
- 570 14. Wang, W. *et al.* Purification and biochemical heterogeneity of the mammalian SWI-SNF complex. *The*  
571 *EMBO Journal* **15**, 5370–5382 (1996).
- 572 15. He, S. *et al.* Structure of nucleosome-bound human BAF complex. *Science* **367**, 875–881 (2020).
- 573 16. Phelan, M. L., Sif, S., Narlikar, G. J. & Kingston, R. E. Reconstitution of a Core Chromatin Remodeling  
574 Complex from SWI/SNF Subunits. *Molecular Cell* **3**, 247–253 (1999).
- 575 17. Clapier, C. R. & Cairns, B. R. The Biology of Chromatin Remodeling Complexes. *Annu. Rev. Biochem.*  
576 **78**, 273–304 (2009).
- 577 18. Saha, A., Wittmeyer, J. & Cairns, B. R. Chromatin remodeling through directional DNA translocation  
578 from an internal nucleosomal site. *Nature Structural & Molecular Biology* **12**, 747–755 (2005).
- 579 19. Saha, A., Wittmeyer, J. & Cairns, B. R. Chromatin remodeling by RSC involves ATP-dependent DNA  
580 translocation. *Genes Dev.* **16**, 2120–2134 (2002).
- 581 20. Velankar, S. S., Soutanas, P., Dillingham, M. S., Subramanya, H. S. & Wigley, D. B. Crystal Structures  
582 of Complexes of PcrA DNA Helicase with a DNA Substrate Indicate an Inchworm Mechanism. *Cell* **97**,  
583 75–84 (1999).
- 584 21. Schwanbeck, R., Xiao, H. & Wu, C. Spatial Contacts and Nucleosome Step Movements Induced by the  
585 NURF Chromatin Remodeling Complex\*. *Journal of Biological Chemistry* **279**, 39933–39941 (2004).
- 586 22. Zofall, M., Persinger, J., Kassabov, S. R. & Bartholomew, B. Chromatin remodeling by ISW2 and  
587 SWI/SNF requires DNA translocation inside the nucleosome. *Nature Structural & Molecular Biology* **13**,  
588 339–346 (2006).



- 589 23. Li, J. *et al.* A Role for SMARCB1 in Synovial Sarcomagenesis Reveals That SS18–SSX Induces  
590 Canonical BAF Destruction. *Cancer Discov* **11**, 2620–2637 (2021).
- 591 24. Weissmann, F. *et al.* biGBac enables rapid gene assembly for the expression of large multisubunit protein  
592 complexes. *PNAS* **113**, E2564–E2569 (2016).
- 593 25. Krueger, C., Berens, C., Schmidt, A., Schnappinger, D. & Hillen, W. Single-chain Tet transregulators.  
594 *Nucleic Acids Res* **31**, 3050–3056 (2003).
- 595 26. Szerlong, H., Saha, A. & Cairns, B. R. The nuclear actin-related proteins Arp7 and Arp9: a dimeric  
596 module that cooperates with architectural proteins for chromatin remodeling. *EMBO J* **22**, 3175–3187  
597 (2003).
- 598 27. Clapier, C. R. *et al.* Regulation of DNA Translocation Efficiency within the Chromatin Remodeler  
599 RSC/Sth1 Potentiates Nucleosome Sliding and Ejection. *Molecular Cell* **62**, 453–461 (2016).
- 600 28. Cairns, B. R., Erdjument-Bromage, H., Tempst, P., Winston, F. & Kornberg, R. D. Two Actin-Related  
601 Proteins Are Shared Functional Components of the Chromatin-Remodeling Complexes RSC and  
602 SWI/SNF. *Molecular Cell* **2**, 639–651 (1998).
- 603 29. Zhao, K. *et al.* Rapid and Phosphoinositol-Dependent Binding of the SWI/SNF-like BAF Complex to  
604 Chromatin after T Lymphocyte Receptor Signaling. *Cell* **95**, 625–636 (1998).
- 605 30. Mashtalir, N. *et al.* A Structural Model of the Endogenous Human BAF Complex Informs Disease  
606 Mechanisms. *Cell* **183**, 802–817.e24 (2020).
- 607 31. Helming, K. C. *et al.* ARID1B is a specific vulnerability in ARID1A -mutant cancers. *Nature Medicine*  
608 **20**, 251–254 (2014).
- 609 32. Wang, Z. *et al.* Dual ARID1A/ARID1B loss leads to rapid carcinogenesis and disruptive redistribution of  
610 BAF complexes. *Nature Cancer* **1**, 909–922 (2020).
- 611 33. Biegel, J. A. *et al.* Germ-Line and Acquired Mutations of INI1 in Atypical Teratoid and Rhabdoid  
612 Tumors. *Cancer Res* **59**, 74–79 (1999).
- 613 34. Versteeg, I. *et al.* Truncating mutations of hSNF5/INI1 in aggressive paediatric cancer. *Nature* **394**, 203–  
614 206 (1998).

- 615 35. Ye, Y. *et al.* Structure of the RSC complex bound to the nucleosome. *Science* **366**, 838–843 (2019).
- 616 36. Allen, M. D., Freund, S. M. V., Zinzalla, G. & Bycroft, M. The SWI/SNF Subunit INI1 Contains an N-  
617 Terminal Winged Helix DNA Binding Domain that Is a Target for Mutations in Schwannomatosis.  
618 *Structure* **23**, 1344–1349 (2015).
- 619 37. Sif, S., Stukenberg, P. T., Kirschner, M. W. & Kingston, R. E. Mitotic inactivation of a human SWI/SNF  
620 chromatin remodeling complex. *Genes Dev.* **12**, 2842–2851 (1998).
- 621 38. Cakiroglu, A. *et al.* Genome-wide reconstitution of chromatin transactions reveals that RSC preferentially  
622 disrupts H2AZ-containing nucleosomes. *Genome Res* **29**, 988–998 (2019).
- 623 39. Lorch, Y., Maier-Davis, B. & Kornberg, R. D. Chromatin remodeling by nucleosome disassembly in vitro.  
624 *PNAS* **103**, 3090–3093 (2006).
- 625 40. Boeger, H., Griesenbeck, J. & Kornberg, R. D. Nucleosome Retention and the Stochastic Nature of  
626 Promoter Chromatin Remodeling for Transcription. *Cell* **133**, 716–726 (2008).
- 627 41. Cairns, B. R. Chromatin remodeling: insights and intrigue from single-molecule studies. *Nat Struct Mol*  
628 *Biol* **14**, 989–996 (2007).
- 629 42. Dechassa, M. L. *et al.* SWI/SNF Has Intrinsic Nucleosome Disassembly Activity that Is Dependent on  
630 Adjacent Nucleosomes. *Molecular Cell* **38**, 590–602 (2010).
- 631 43. Schlichter, A., Kasten, M. M., Parnell, T. J. & Cairns, B. R. Specialization of the chromatin remodeler  
632 RSC to mobilize partially-unwrapped nucleosomes. *eLife* **9**, e58130 (2020).
- 633 44. Lorch, Y., Zhang, M. & Kornberg, R. D. Histone Octamer Transfer by a Chromatin-Remodeling  
634 Complex. *Cell* **96**, 389–392 (1999).
- 635 45. Bruno, M. *et al.* Histone H2A/H2B Dimer Exchange by ATP-Dependent Chromatin Remodeling  
636 Activities. *Molecular Cell* **12**, 1599–1606 (2003).
- 637 46. Baliñas-Gavira, C. *et al.* Frequent mutations in the amino-terminal domain of BCL7A impair its tumor  
638 suppressor role in DLBCL. *Leukemia* **34**, 2722–2735 (2020).
- 639 47. Szerlong, H. *et al.* The HSA domain binds nuclear actin-related proteins to regulate chromatin-remodeling  
640 ATPases. *Nature Structural & Molecular Biology* **15**, 469–476 (2008).

- 641 48. Dyer, P. N. *et al.* Reconstitution of Nucleosome Core Particles from Recombinant Histones and DNA. in  
642 *Methods in Enzymology* vol. 375 23–44 (Academic Press, 2003).
- 643 49. Lowary, P. T. & Widom, J. New DNA sequence rules for high affinity binding to histone octamer and  
644 sequence-directed nucleosome positioning<sup>1</sup> Edited by T. Richmond. *Journal of Molecular Biology* **276**,  
645 19–42 (1998).
- 646
- 647

Fig. 1

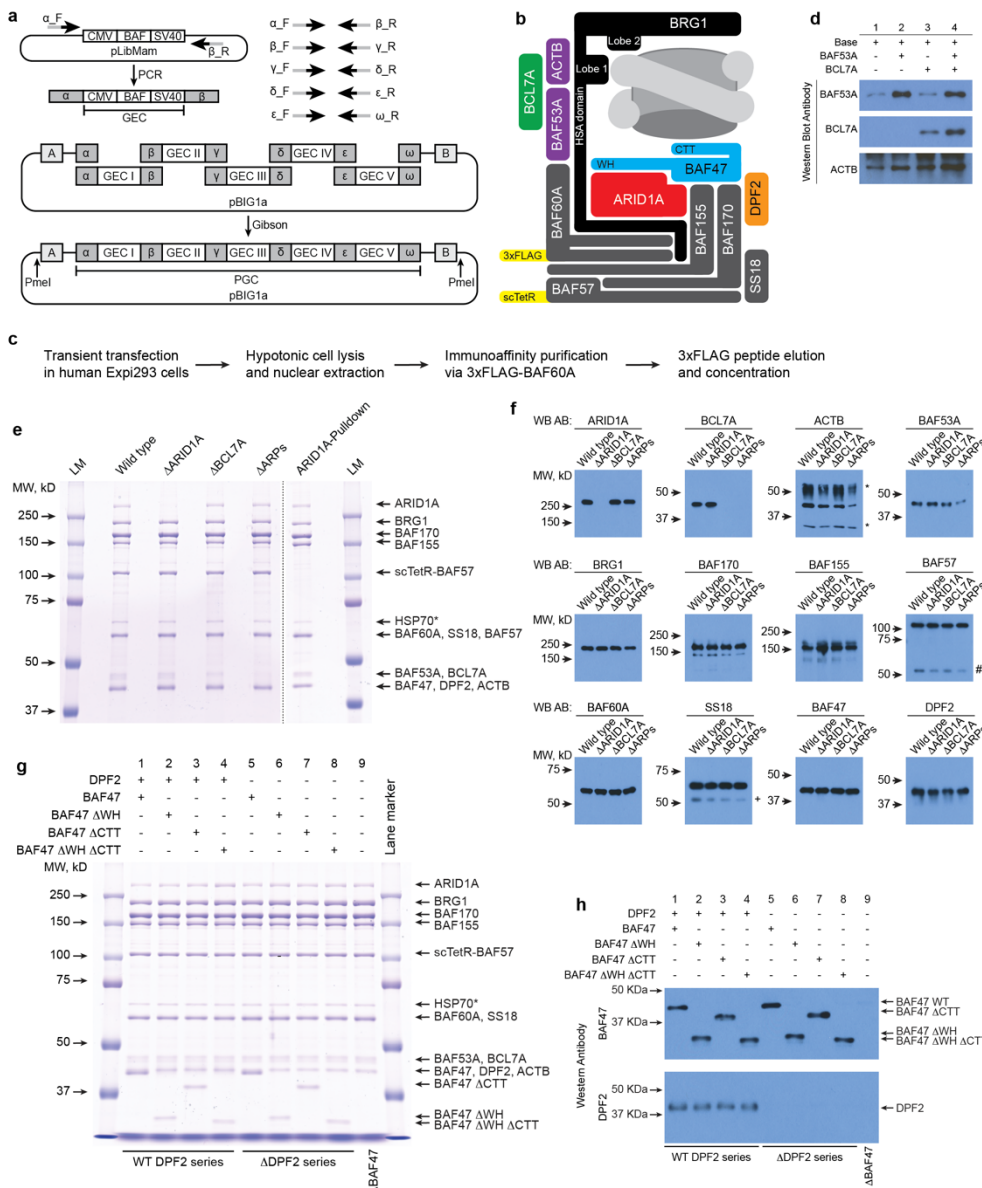

**Fig. 1. A system for the production and purification of fully-assembled recombinant CBAF complexes from human cells.** **a**, Schematic of the modified biGBac cloning system. CBAF subunits (BAF) are cloned into the pLibMam vector. Predefined oligonucleotides are used to PCR amplify a gene expression cassette (GEC) while introducing Gibson homology sequences ( $\alpha$ ,  $\beta$  etc.). Gibson assembly is used to combine GECs with a biGBac pBIG1 vector. Digestion of pBIG1 vectors with PmeI releases a poly-gene expression cassette (PGC) flanked by additional Gibson homology sequences (A, B) to subclone into a pBIG2 vector. **b**, Schematic of the recombinant wild type CBAF complex produced in this study with key features highlighted. **c**, Protocol for the expression and purification of recombinant CBAF from human cells. **d**, Western blots for ARP module assembly dependencies. Base expression vectors included in all transfections were pBIG2- $\Delta$ ARPs and pLibMam-ARID1A. pLibMam-BAF53A, pLibMam-BCL7A, neither, or both were co-transfected as indicated. **e**, Coomassie-stained SDS-PAGE gels of purified recombinant CBAF complexes. See Methods for details of plasmid transfections. HSP70\* is a low-level contaminating protein that is not part of CBAF, but is common in large-scale expression/purification systems, as it binds to various partially-folded regions. LM: Lane Marker. **f**, Western blots of purified recombinant CBAF complexes shown in panel **e**. \*: IgG heavy and light chain. #: endogenous BAF57. +: endogenous short splice variant of SS18. **g**, Coomassie-stained SDS-PAGE gels of purified recombinant CBAF complexes. See panel **e** for HSP70\* explanation. **h**, Western blots of purified recombinant CBAF complexes shown in panel **g**.

Fig. 2

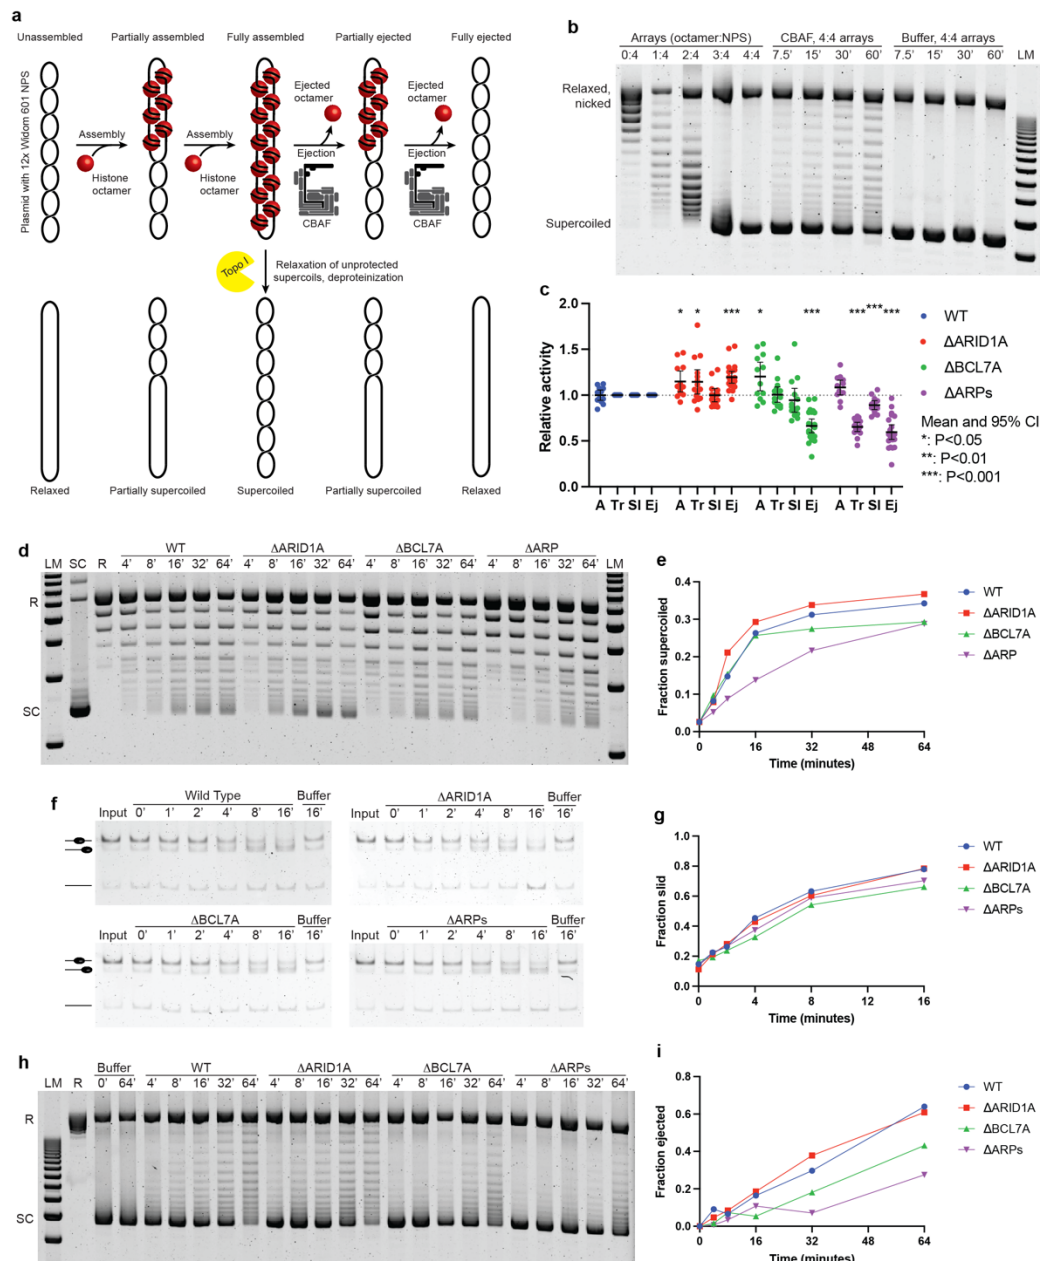

666  
667  
668 **Fig. 2. ARPs and BCL7A enhance chromatin remodeling through distinct mechanisms, while ARID1A**  
669 **is dispensable for remodeling.** **a**, Schematic of the nucleosome ejection assay. **b**, Example of an ejection  
670 assay gel. Arrays were assembled with various molar ratios of octamer to nucleosome positioning  
671 sequence (NPS) prior to treatment with Topo I. 4:4 arrays were incubated with CBAF or buffer for the indicated times.  
672 LM: Lane Marker. **c**, Summary of data from ATPase (A), translocation (Tr), sliding (SI) and ejection (Ej)  
673 assays. Error bars represent mean +/- 95% confidence interval. **d**, Representative gel for a DNA  
674 translocation assay. Tet-tethered DNA translocation on a plasmid containing the TetO sequence in the  
675 presence of Topo 1 results in the accumulation of positive supercoils as translocation occurs. R: Relaxed  
676 plasmid; SC: Supercoiled plasmid; LM: Lane Marker. **e**, Quantification of the DNA translocation assay shown  
677 in panel **d**. The fraction of total lane intensity representing supercoiled topoisomers is quantified and plotted  
678 over time. **f**, Representative gel for a nucleosome sliding assay. **g**, Quantification of the nucleosome sliding  
679 assay shown in panel **f**. The fraction of end-positioned mononucleosomes (slid) are quantified and plotted  
680 over time. **h**, Representative gel for a nucleosome ejection assay. R: Relaxed plasmid; SC: Supercoiled  
681 plasmid; LM: Lane Marker. **i**, Quantification of the nucleosome ejection assay shown in panel **h**. The fraction  
682 of total lane intensity corresponding to fully supercoiled topoisomers is quantified and normalized to the  
683 Buffer T=0' timepoint. The resulting values are subtracted from 1 and plotted over time.





699

**Fig. 4**

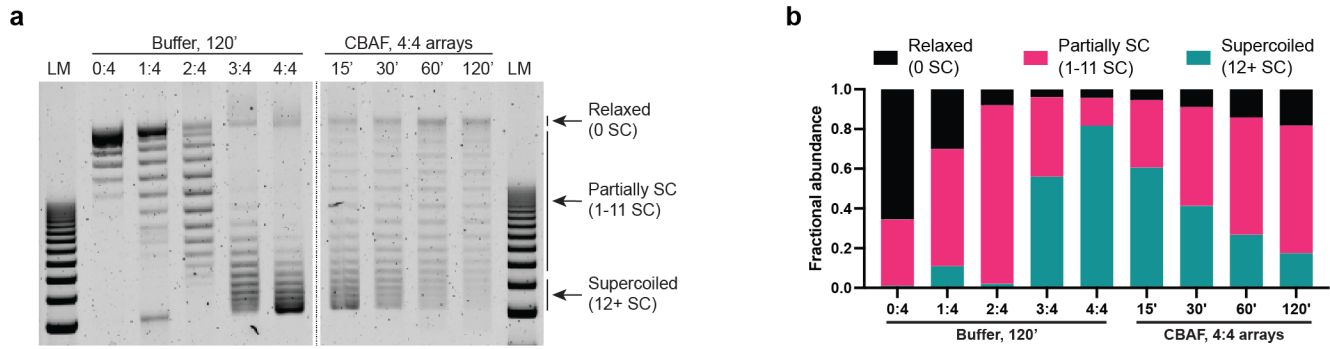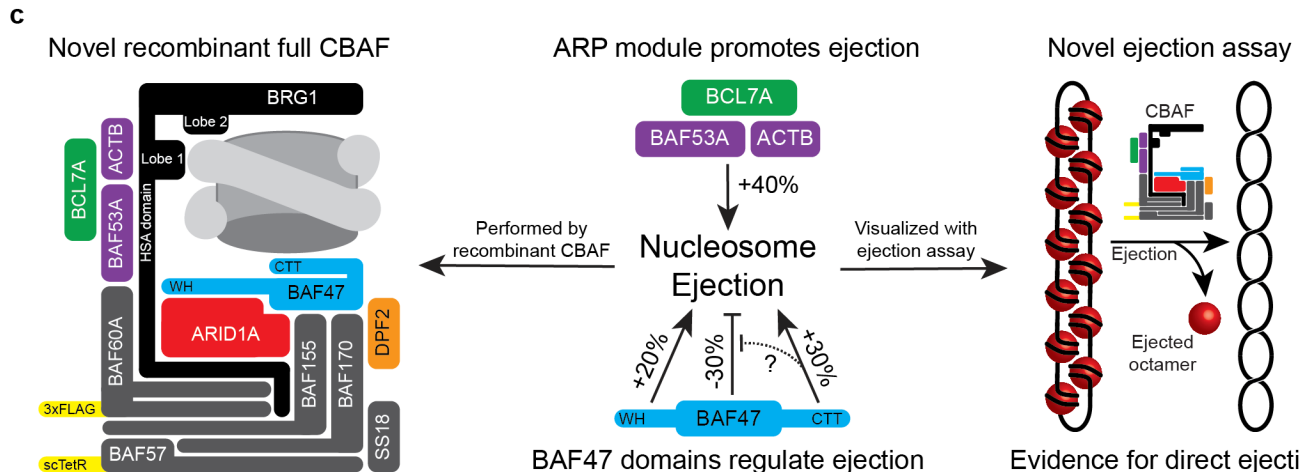

**Fig. 4. Evidence for direct ejection of nucleosomes from nucleosome arrays by CBAF.** **a**, Evidence for direct nucleosome ejection by CBAF. Polynucleosome arrays were assembled with various histone octamer to Widom 601 nucleosome positioning sequence molar ratios (0:4, 1:4, 2:4, 3:4, or 4:4) as indicated. Assembled arrays were incubated with buffer and Topo I for 120'. 4:4 arrays (fully assembled) were used as input for a timecourse ejection assay. All samples were treated with T5 exonuclease to remove nicked plasmid immediately prior to agarose gel electrophoresis. SC: Supercoiled; LM: Lane Marker. **b**, Quantification of the ejection assay shown in panel **a**. The fractions of total lane intensity corresponding to fully relaxed plasmid (0 SC), partially relaxed/supercoiled plasmid (1-11 SC), and fully supercoiled plasmid (12+ SC) are graphed. **c**, A model of the system and results. Purified recombinant CBAF nucleosome ejection activity measured with a novel assay reveals roles for the Actin-Related Protein (ARP) module, including BCL7A, as well as the Winged Helix (WH) and C-Terminal Tail (CTT) domains of BAF47 in regulating ejection activity. See main text for discussion.

700  
701  
702  
703  
704  
705  
706  
707  
708  
709  
710  
711  
712  
713  
714  
715
